# Supplementary material for: Antioxidant and Cytoprotective Effects of the Di-O-Caffeoylquinic Acid Family: The Mechanism, Structure–Activity Relationship, and Conformational Effect
Source: MDPI journal article supplement (doi:10.3390/molecules23010222), 2018-01-20
Supplement: s1 [file s1]

## Supplements

# Antioxidant and Cytoprotective Effects of the Di-O-Caffeoylquinic Acid Family: The Mechanism, Structure–Activity Relationship, and Conformational Effect

Xican Li <sup>1,2,\*†</sup>, Ke Li <sup>3,4,†</sup>, Hong Xie <sup>1,2</sup>, Yulu Xie <sup>1,2</sup>, Yueying Li <sup>1</sup>, Xiaojun Zhao <sup>1,2</sup>, Xiaohua Jiang <sup>5</sup> and Dongfeng Chen <sup>3,4,\*</sup>

<sup>1</sup> School of Chinese Herbal Medicine, Guangzhou University of Chinese Medicine, Waihuan East Road No. 232, Guangzhou Higher Education Mega Center, Guangzhou 510006, China; xiehongxh1@163.com (H.X.); [xieyulu1900@163.com](mailto:xieyulu1900@163.com) (Y.X.); [lln@gzucm.edu.cn](mailto:lln@gzucm.edu.cn) (Y.L.); [zxj@gzucm.edu.cn](mailto:zxj@gzucm.edu.cn) (X.Z.)

<sup>2</sup> Innovative Research & Development Laboratory of TCM, Guangzhou University of Chinese Medicine, Waihuan East Road No. 232, Guangzhou Higher Education Mega Center, Guangzhou 510006, China

<sup>3</sup> School of Basic Medical Science, Guangzhou University of Chinese Medicine, Waihuan East Road No. 232, Guangzhou Higher Education Mega Center, Guangzhou 510006, China; 1090992678@qq.com (K.L.)

<sup>4</sup> The Research Center of Basic Integrative Medicine, Guangzhou University of Chinese Medicine, Waihuan East Road No. 232, Guangzhou Higher Education Mega Center, Guangzhou 510006, China

<sup>5</sup> School of Biomedical Sciences, Faculty of Medicine, The Chinese University of Hong Kong, Sha Tin, Hong Kong, China; [xjiang@cuhk.edu.hk](mailto:xjiang@cuhk.edu.hk) (X.J.)

\* Correspondence: [lixican@126.com](mailto:lixican@126.com) (X.L.); [chen888@gzucm.edu.cn](mailto:chen888@gzucm.edu.cn) (D.C.); Tel.: +86-203-935-8076

† These authors contributed equally to this work.

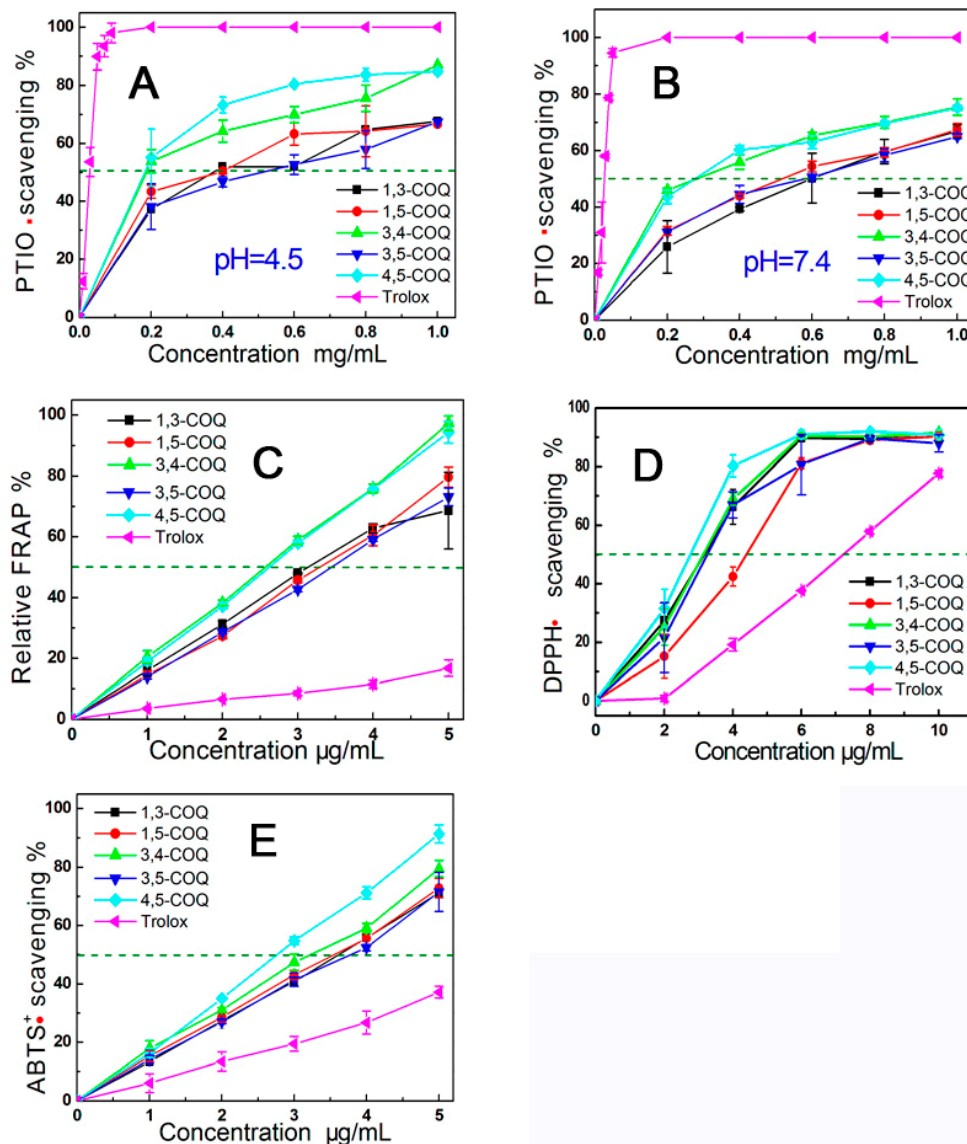

**Fig. S1.** Dose response curves of di-*O*-caffeoylquinic acids (**di-COQs**) in various antioxidant assays: (A) PTIO•-radical-scavenging assay (pH 4.5); (B) PTIO•-radical-scavenging assay (pH 7.4). (C) FRAP assay. (D) DPPH•-scavenging assay. (E) ABTS<sup>+</sup>•- scavenging assay.

Each value is expressed as the mean $\pm$ SD,  $n=3$ .

## Spectrum of PTIO.

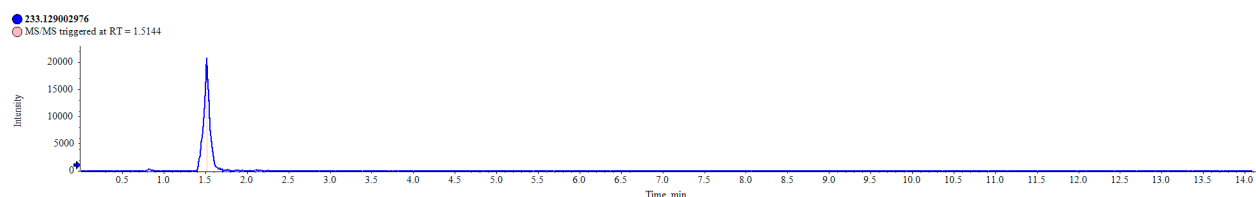

● Spectrum from 3-caffeoyl+PTIO.wiff (sample 1) - 3-caffeoyl+PTIO, Experiment 1, -TOF MS (50 - 1600) from 1.485 to 1.511 min  
● C13H17N2O2

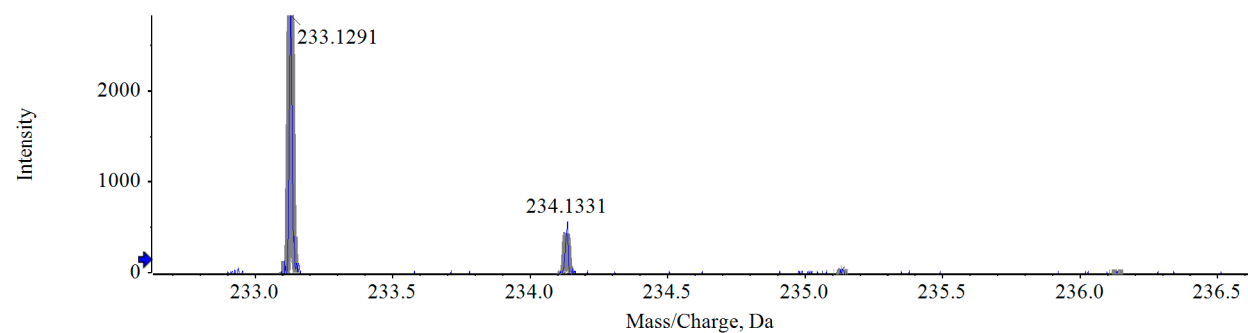

Spectrum from 3-caffeoyl+PTIO.wiff (sample 1) - 3-caffeoyl+PTIO, Experiment 2, -TOF MS<sup>2</sup> (50 - 1600) from 1.514 min  
Precursor: 233.1 Da CE=-45

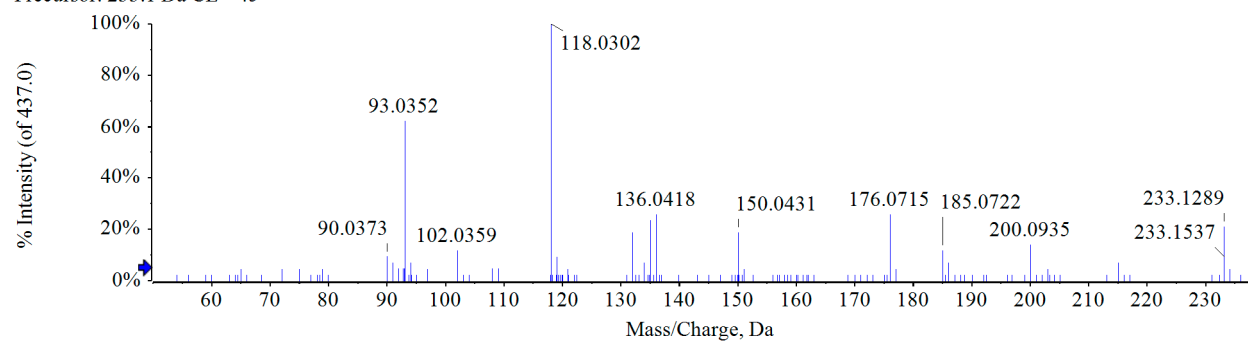

Spectrum of Dimer product in the mixture of chlorogenic acid with PTIO •

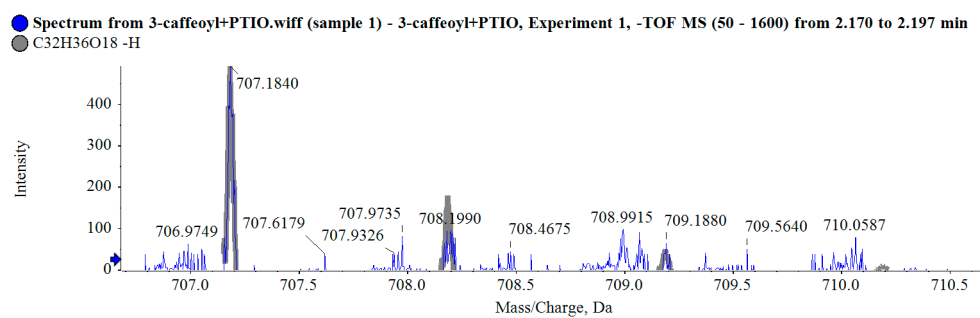

**Fig. S2** Original Data of UPLC-ESI-MS/MS analysis.
